# Supplementary material for: Fluoride-assisted synthesis of mullite (Al5.65Si0.35O9.175) nanowires
Source: Royal Society of Chemistry journal article supplement (doi:10.1039/b603999e), 2006-01-01
Supplement: b603999e.pdf [file b603999e.pdf]

5

## Supplementary data

:

10

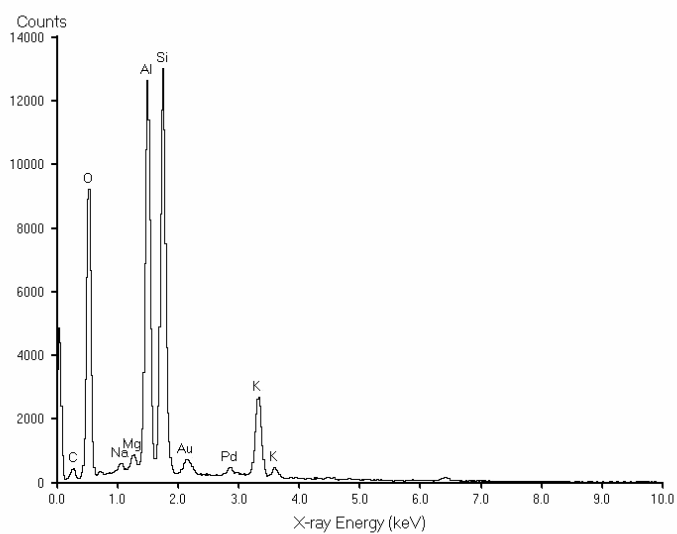

**Fig.S1** EDS result of a clean mica substrate before nanowire growth. The peaks of Au and Pd can be attributed to the Au-Pd alloy coating, which is applied to assist the conductivity. While Na, Mg, and K peaks are caused by the micro-component of the mica substrate.

15

20

25

30

35

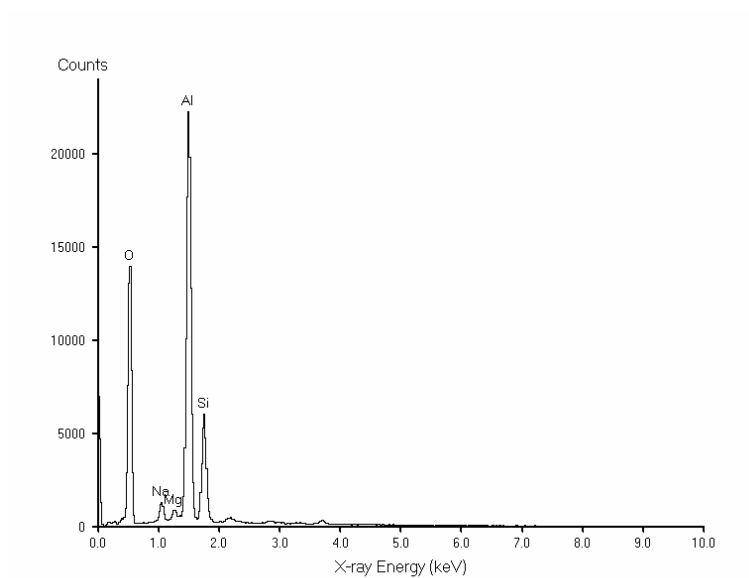

**Fig.S2** EDS result of the synthesized nanowires. The peaks of Na and Mg originate from the micro-component of the mica substrate.

40

45

50

55

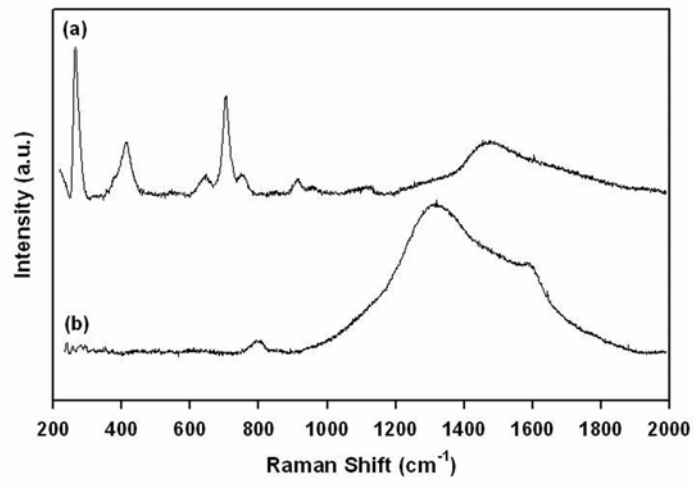

Fig.S3 Raman spectra of the clean mica substrate and mullite nanowires.

60

65

70

75

80
